# Supplementary material
Source: PubMed Central journal article supplement (PMC10330468)
Supplement: NIHMS1901411-supplement-Table_S1.pdf [file NIHMS1901411-supplement-Table_S1.pdf]

**Supplementary table 1: Representative Media pH, pCO<sub>2</sub> and pO<sub>2</sub> measurements**

|                           | <b>Sample</b>            | <b>pH</b>   | <b>pCO<sub>2</sub> (mmHg)</b> | <b>pO<sub>2</sub> (mmHg)</b> |
|---------------------------|--------------------------|-------------|-------------------------------|------------------------------|
| <b>5% CO<sub>2</sub></b>  | <b>DMEM Start</b>        | <b>7.30</b> | <b>40.3</b>                   | <b>141.4</b>                 |
|                           | <b>DMEM End</b>          | <b>7.30</b> | <b>38.5</b>                   | <b>142.2</b>                 |
|                           | <b>THP-1 (DMEM)</b>      | <b>7.29</b> | <b>38</b>                     | <b>148</b>                   |
|                           | <b>THP-1 (DMEM +LPS)</b> | <b>7.27</b> | <b>40.5</b>                   | <b>146.3</b>                 |
| <b>10% CO<sub>2</sub></b> | <b>DMEM Start</b>        | <b>7.36</b> | <b>78.8</b>                   | <b>139</b>                   |
|                           | <b>DMEM End</b>          | <b>7.36</b> | <b>75.8</b>                   | <b>140.7</b>                 |
|                           | <b>THP-1 (DMEM)</b>      | <b>7.36</b> | <b>76</b>                     | <b>143.9</b>                 |
|                           | <b>THP-1 (DMEM +LPS)</b> | <b>7.36</b> | <b>78.7</b>                   | <b>144</b>                   |

**Supplementary table 1:** Representative media pH, pCO<sub>2</sub> and pO<sub>2</sub> measurements in DMEM media at the start and end of a 4hr experiment (without cells) in DMEM media taken from THP-1 cells exposed to 5% or 10% CO<sub>2</sub> (4 h) ± LPS (2 h) at the end of the experiment using a RAPIDPoint 500 blood gas analyser (Siemens). Media composition is specifically designed to have slightly more alkaline pH at 10% CO<sub>2</sub> to exclude the possibility of having acidosis co-incident with hypercapnia (10% CO<sub>2</sub>).
