# Supplementary material
Source: PubMed Central journal article supplement (PMC10330468)
Supplement: NIHMS1901411-supplement-Table_S2.pdf [file NIHMS1901411-supplement-Table_S2.pdf]

## Supplementary table 2: Primer details

| Target | Gene       | Primer Sequence              |
|--------|------------|------------------------------|
| DNA    | B2M (F)    | 5'-CAAGACTGTTGAGGACGCCA-3'   |
| DNA    | B2M (R)    | 5'-GGTGAGCGCGCTTAGTGTAT-3'   |
| DNA    | MT-ND4 (F) | 5'-CACAAACCACCCACAGCCTAA-3   |
| DNA    | MT-ND4 (R) | 5'-TGTGAGGGGTAGGAGTCAGG-3'   |
| cDNA   | ACADS (F)  | 5'-CTCAGCGAACCAGGGAACG -3'   |
| cDNA   | ACADS (R)  | 5'- TTCAGAACCCATGAGTCGCC-3'  |
| cDNA   | PPIA (F)   | 5'-CAGGGAAAGACCAGGAGCAG-3'   |
| cDNA   | PPIA (R)   | 5'-GGAGCAGTCTCCGGTTTTGA-3'   |
| cDNA   | PYCR1(F)   | 5'-GGCCACAGTTTCTGCTCTCA-3'   |
| cDNA   | PYCR1 (R)  | 5'-AAACGCTGACAGCTTCTTCTCA-3' |

**Supplementary table 2:** Primer details for PCR based experiments associated with mitochondrial content analysis and qPCR of transcripts.
